# Supplementary material for: MicroRNA-mediated regulation of p21 and TASK1 cellular restriction factors enhances HIV-1 infection
Source: PubMed Central journal article supplement (PMC4406127; doi:10.1242/jcs.167817), 2015-04-15
Supplement: supp_128.8.1607_JCS167817.pdf [file supp_128.8.1607_JCS167817.pdf]

## **MicroRNA regulation of p21 and TASK1 cellular restriction-factors enhances HIV-1 infection**

Luba Farberov<sup>1</sup>, Eytan Herzig<sup>1</sup>, Shira Modai<sup>1</sup>, Ofer Isakov<sup>1</sup>, Amnon Hizi<sup>1</sup>, Noam Shomron<sup>1\*</sup>

<sup>1</sup>Faculty of Medicine, Tel Aviv University, Tel Aviv 69978, Israel

\* Corresponding author: N Shomron, TEL +972-3-640-6594, [nshomron@post.tau.ac.il](mailto:nshomron@post.tau.ac.il)

**Table S1. Differently expressed miRNAs by more than 2 FC detected using the deep sequencing method in Sup-T1 or T1 lymphocytes cell-lines .** (A) 126 miRNAs which were up-regulated by more than 2 FC in the Sup-T1 cell-line. (B) 25 miRNAs which were down-regulated by more than 2 FC in the Sup-T1 cell-line. (C) 36 miRNAs which were up-regulated by more than 2 FC in the T1 cell-line. (D) 54 miRNAs which were down-regulated by more than 2 FC in the T1 cell-line.

**Table S2. Differently expressed miRNAs by more than 2 FC detected using the TaqMan low-density array method in Sup-T1 lymphocyte cell-line.** (A) 72 miRNAs which were up-regulated by more than 2 FC in the Sup-T1 cell-line. (B) 60 miRNAs which were down-regulated by more than 2 FC in the Sup-T1 cell-line.

**Figure S1. Expression of let-7c, miR-34a and miR-124a following HIV-2 infection for 24 hours, 48 hours and 5 days.** Normalized qPCR fold change results are presented.

**Figure S2. The p21 protein is directly regulated by let-7c.** Western blot analysis of p21 and actin in H9 cell-line following 72 hours of let-7c OE, (A) sample gel and (B) quantization of three experiments. Bands quantification was done using ImageJ software. (n=3, \*p<0.05.)

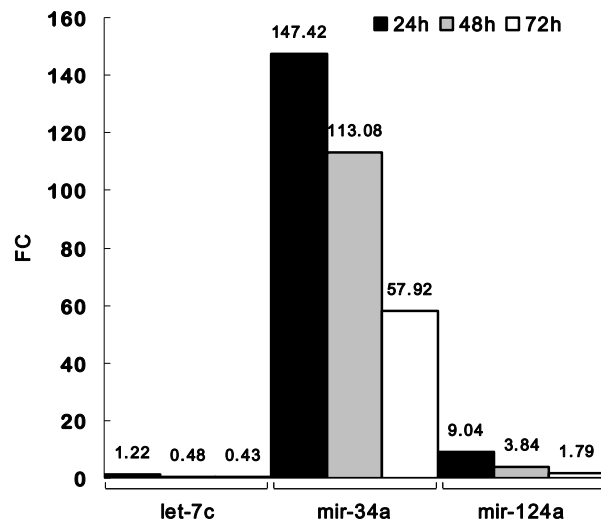

Figure S1

A

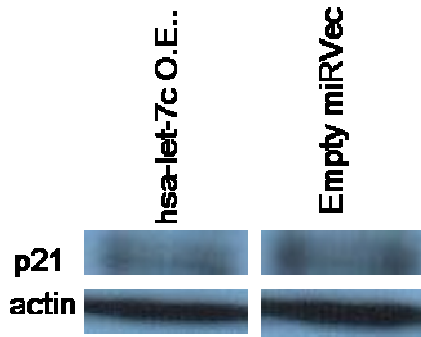

B

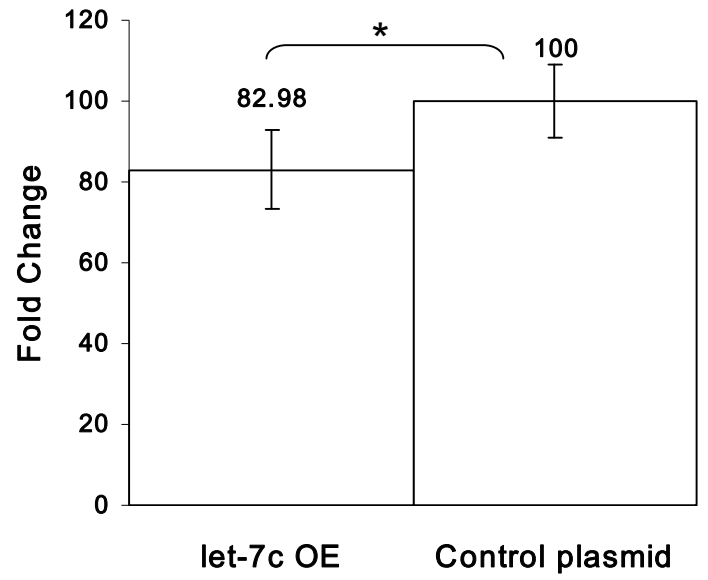

Figure S2

## MicroRNA regulation of p21 and TASK1 cellular restriction-factors enhances HIV-1 infection

Luba Farberov<sup>1</sup>, Eytan Herzig<sup>1</sup>, Shira Modai<sup>1</sup>, Ofer Isakov<sup>1</sup>, Amnon Hizi<sup>1</sup>, Noam Shomron<sup>1\*</sup>

<sup>1</sup>Faculty of Medicine, Tel Aviv University, Tel Aviv 69978, Israel

\* Corresponding author: N Shomron, TEL +972-3-640-6594, [nshomron@post.tau.ac.il](mailto:nshomron@post.tau.ac.il)

(A)

| FC    | miRNA           | FC    | miRNA           | FC      | miRNA          |
|-------|-----------------|-------|-----------------|---------|----------------|
| 2.895 | hsa-miR-3184    | 7.128 | hsa-miR-1291    | 998.440 | hsa-miR-1290   |
| 2.851 | hsa-miR-3647-5p | 7.128 | hsa-miR-3651    | 331.039 | hsa-miR-1246   |
| 2.851 | hsa-let-7g*     | 7.128 | hsa-miR-1257    | 263.732 | hsa-miR-608    |
| 2.851 | hsa-let-7a*     | 7.128 | hsa-miR-1295    | 114.046 | hsa-miR-1203   |
| 2.645 | hsa-miR-324-5p  | 7.128 | hsa-miR-3192    | 57.023  | hsa-miR-3687   |
| 2.640 | hsa-miR-331-5p  | 7.128 | hsa-miR-662     | 36.443  | hsa-miR-184    |
| 2.626 | hsa-miR-3909    | 7.128 | hsa-miR-139-5p  | 33.755  | hsa-miR-937    |
| 2.376 | hsa-miR-1271    | 7.128 | hsa-miR-877*    | 28.512  | hsa-miR-1288   |
| 2.376 | hsa-miR-628-5p  | 6.480 | hsa-miR-874     | 28.512  | hsa-miR-762    |
| 2.376 | hsa-miR-1226    | 6.178 | hsa-miR-146a    | 28.512  | hsa-miR-1972   |
| 2.376 | hsa-let-7i*     | 5.702 | hsa-miR-203     | 21.384  | hsa-miR-4301   |
| 2.376 | hsa-miR-30b*    | 5.702 | hsa-miR-1273d   | 21.384  | hsa-miR-3913   |
| 2.376 | hsa-miR-3607-3p | 5.578 | hsa-miR-629     | 21.384  | hsa-miR-3141   |
| 2.376 | hsa-miR-3157    | 5.346 | hsa-miR-3127    | 21.384  | hsa-miR-1234   |
| 2.376 | hsa-miR-3121    | 5.252 | hsa-miR-375     | 17.820  | hsa-miR-760    |
| 2.376 | hsa-miR-19a*    | 5.106 | hsa-miR-192     | 16.038  | hsa-miR-574-5p |
| 2.376 | hsa-miR-580     | 5.094 | hsa-miR-215     | 14.256  | hsa-miR-10a    |
| 2.376 | hsa-miR-296-5p  | 4.752 | hsa-miR-3688    | 14.256  | hsa-miR-10b    |
| 2.376 | hsa-miR-193a-3p | 4.752 | hsa-miR-3615    | 14.256  | hsa-miR-3187   |
| 2.376 | hsa-miR-20a*    | 4.752 | hsa-miR-1284    | 14.256  | hsa-miR-3664   |
| 2.257 | hsa-miR-1296    | 4.455 | hsa-miR-3065-3p | 14.256  | hsa-miR-615-3p |
| 2.251 | hsa-miR-138-1*  | 4.424 | hsa-miR-425*    | 14.256  | hsa-miR-1538   |

|       |                |       |                 |        |                 |
|-------|----------------|-------|-----------------|--------|-----------------|
| 2.248 | hsa-miR-877    | 4.386 | hsa-miR-570     | 14.256 | hsa-miR-1224-5p |
| 2.247 | hsa-miR-150    | 4.281 | hsa-miR-152     | 14.256 | hsa-miR-4298    |
| 2.197 | hsa-miR-625    | 4.277 | hsa-miR-193a-5p | 14.256 | hsa-miR-297     |
| 2.193 | hsa-miR-1180   | 4.269 | hsa-miR-23a     | 11.880 | hsa-miR-196a    |
| 2.187 | hsa-miR-130b*  | 3.734 | hsa-miR-143     | 11.405 | hsa-miR-205     |
| 2.139 | hsa-miR-30e    | 3.620 | hsa-miR-210     | 10.692 | hsa-miR-1236    |
| 2.138 | hsa-miR-135a   | 3.564 | hsa-miR-3065-5p | 9.942  | hsa-miR-3613-5p |
| 2.131 | hsa-miR-502-3p | 3.564 | hsa-miR-33b     | 8.910  | hsa-miR-1307    |
| 2.112 | hsa-miR-93*    | 3.564 | hsa-miR-22*     | 7.128  | hsa-miR-491-3p  |
| 2.096 | hsa-miR-671-5p | 3.564 | hsa-miR-29a*    | 7.128  | hsa-miR-1       |
| 2.083 | hsa-miR-26b    | 3.564 | hsa-miR-3647-3p | 7.128  | hsa-miR-193b*   |
| 2.056 | hsa-miR-361-5p | 3.562 | hsa-miR-30d*    | 7.128  | hsa-miR-665     |
| 2.050 | hsa-miR-129-3p | 3.445 | hsa-miR-642a    | 7.128  | hsa-miR-1266    |
| 2.037 | hsa-miR-3912   | 3.288 | hsa-miR-500a*   | 7.128  | hsa-miR-3123    |
| 2.035 | hsa-miR-374a   | 3.168 | hsa-miR-3138    | 7.128  | hsa-miR-2110    |
| 2.020 | hsa-miR-378*   | 3.162 | hsa-miR-23b     | 7.128  | hsa-miR-1179    |
|       |                | 3.009 | hsa-miR-128     | 7.128  | hsa-miR-3907    |
|       |                | 2.970 | hsa-miR-1303    | 7.128  | hsa-miR-1248    |
|       |                | 2.945 | hsa-miR-374b    | 7.128  | hsa-miR-1282    |
|       |                | 2.939 | hsa-miR-652     | 7.128  | hsa-miR-548p    |
|       |                | 2.916 | hsa-miR-454*    | 7.128  | hsa-miR-3692*   |
|       |                | 2.916 | hsa-miR-660     | 7.128  | hsa-miR-3620    |

126 miRNAs which were up-regulated by more than 2 FC in the Sup-T1 cell-line.

(B)

| <b>FC</b> | <b>miRNA</b>    | <b>FC</b> | <b>miRNA</b>     | <b>FC</b> | <b>miRNA</b>   |
|-----------|-----------------|-----------|------------------|-----------|----------------|
| 0.324     | hsa-miR-3177    | 0.467     | hsa-miR-33a*     | 0.494     | hsa-miR-3928   |
| 0.285     | hsa-miR-191*    | 0.445     | hsa-miR-16-1*    | 0.482     | hsa-miR-17*    |
| 0.228     | hsa-miR-423-5p  | 0.445     | hsa-miR-301a     | 0.482     | hsa-miR-342-3p |
| 0.223     | hsa-miR-590-5p  | 0.401     | hsa-miR-181a*    | 0.481     | hsa-let-7c     |
| 0.216     | hsa-miR-27a*    | 0.396     | hsa-miR-424*     | 0.480     | hsa-miR-130b   |
| 0.192     | hsa-miR-1260    | 0.388     | hsa-miR-29c      | 0.479     | hsa-miR-365    |
| 0.170     | hsa-miR-3613-3p | 0.375     | hsa-miR-219-1-3p | 0.473     | hsa-let-7d     |
| 0.069     | hsa-miR-92a-1*  | 0.344     | hsa-miR-191      | 0.471     | hsa-miR-106b   |
| 0.061     | hsa-miR-106a    |           |                  |           |                |

25 miRNAs which were down-regulated by more than 2 FC in the Sup-T1 cell-line.

T1

(C)

| <b>FC</b> | <b>miRNA</b>   | <b>FC</b> | <b>miRNA</b>    | <b>FC</b> | <b>miRNA</b>   |
|-----------|----------------|-----------|-----------------|-----------|----------------|
| 2.285     | hsa-miR-320b   | 2.748     | hsa-miR-660     | 4.529     | hsa-miR-1290   |
| 2.281     | hsa-miR-100    | 2.707     | hsa-miR-1       | 4.264     | hsa-miR-135a   |
| 2.275     | hsa-miR-877*   | 2.690     | hsa-miR-548j    | 4.113     | hsa-miR-146a*  |
| 2.244     | hsa-miR-328    | 2.631     | hsa-miR-125a-5p | 3.344     | hsa-miR-3676   |
| 2.199     | hsa-miR-335*   | 2.576     | hsa-miR-361-3p  | 3.344     | hsa-miR-629    |
| 2.185     | hsa-let-7i*    | 2.568     | hsa-miR-582-5p  | 3.310     | hsa-miR-1246   |
| 2.162     | hsa-miR-148a   | 2.563     | hsa-miR-330-5p  | 3.194     | hsa-let-7b     |
| 2.123     | hsa-miR-1266   | 2.548     | hsa-miR-151-3p  | 2.986     | hsa-miR-616*   |
| 2.123     | hsa-miR-1254   | 2.395     | hsa-miR-99b     | 2.945     | hsa-miR-582-3p |
| 2.070     | hsa-miR-151-5p | 2.388     | hsa-miR-500a    | 2.911     | hsa-miR-130a   |
| 2.047     | hsa-miR-550a   | 2.388     | hsa-miR-1271    | 2.831     | hsa-miR-629*   |
| 2.027     | hsa-miR-138-1* | 2.315     | hsa-miR-320c    | 2.787     | hsa-miR-513b   |

36 miRNAs which were up-regulated by more than 2 FC in the T1 cell-line.

(D)

| <b>FC</b> | <b>miRNA</b>   | <b>FC</b> | <b>miRNA</b>    | <b>FC</b> | <b>miRNA</b>    |
|-----------|----------------|-----------|-----------------|-----------|-----------------|
| 0.299     | hsa-miR-1278   | 0.409     | hsa-miR-3613-3p | 0.500     | hsa-miR-3942    |
| 0.287     | hsa-miR-615-5p | 0.398     | hsa-miR-185*    | 0.478     | hsa-miR-3692    |
| 0.259     | hsa-miR-558    | 0.393     | hsa-miR-150     | 0.478     | hsa-miR-3682    |
| 0.259     | hsa-miR-3681   | 0.392     | hsa-miR-3131    | 0.477     | hsa-miR-1274a   |
| 0.250     | hsa-miR-548w   | 0.392     | hsa-miR-99b*    | 0.472     | hsa-miR-3158    |
| 0.220     | hsa-miR-223    | 0.387     | hsa-miR-23a*    | 0.472     | hsa-miR-3913    |
| 0.199     | hsa-miR-3123   | 0.367     | hsa-miR-1304    | 0.468     | hsa-miR-2277-5p |
| 0.190     | hsa-miR-1261   | 0.363     | hsa-miR-548u    | 0.464     | hsa-miR-3149    |
| 0.172     | hsa-miR-1276   | 0.359     | hsa-miR-3678-3p | 0.451     | hsa-miR-222     |
| 0.168     | hsa-miR-671-5p | 0.359     | hsa-miR-3168    | 0.448     | hsa-miR-181a*   |
| 0.160     | hsa-miR-1273e  | 0.347     | hsa-miR-1305    | 0.447     | hsa-miR-720     |
| 0.159     | hsa-miR-2276   | 0.336     | hsa-miR-34c-5p  | 0.443     | hsa-miR-27a*    |
| 0.148     | hsa-miR-580    | 0.332     | hsa-miR-3142    | 0.440     | hsa-miR-625*    |
| 0.113     | hsa-miR-1275   | 0.329     | hsa-miR-183*    | 0.431     | hsa-miR-145     |
| 0.092     | hsa-miR-641    | 0.325     | hsa-miR-1280    | 0.427     | hsa-miR-424*    |
| 0.089     | hsa-miR-503    | 0.318     | hsa-miR-3164    | 0.425     | hsa-miR-3127    |
| 0.074     | hsa-miR-656    | 0.318     | hsa-miR-221     | 0.420     | hsa-miR-374a*   |
| 0.068     | hsa-miR-3681*  | 0.301     | hsa-miR-548n    | 0.419     | hsa-miR-548k    |

54 miRNAs which were down-regulated by more than 2 FC in the T1 cell-line.



## MicroRNA regulation of p21 and TASK1 cellular restriction-factors enhances HIV-1 infection

Luba Farberov<sup>1</sup>, Eytan Herzig<sup>1</sup>, Shira Modai<sup>1</sup>, Ofer Isakov<sup>1</sup>, Amnon Hizi<sup>1</sup>, Noam Shomron<sup>1\*</sup>

<sup>1</sup>Faculty of Medicine, Tel Aviv University, Tel Aviv 69978, Israel

\* Corresponding author: N Shomron, TEL +972-3-640-6594, [nshomron@post.tau.ac.il](mailto:nshomron@post.tau.ac.il)

(A)

| FC        | miRNA           | FC        | miRNA           | FC        | miRNA           |
|-----------|-----------------|-----------|-----------------|-----------|-----------------|
| 352843.53 | hsa-miR-10a     | 206.02    | hsa-miR-199a-3p | 186.44    | hsa-miR-367     |
| 3.67      | hsa-miR-126     | 2.66      | hsa-miR-200c    | 2519.84   | hsa-miR-376a    |
| 29.36     | hsa-miR-133a    | 36.72     | hsa-miR-202     | 14.99     | hsa-miR-381     |
| 2.10      | hsa-miR-138     | 3.46      | hsa-miR-210     | 16284.45  | hsa-miR-382     |
| 2.01      | hsa-miR-139-5p  | 15212.44  | hsa-miR-211     | 271.34    | hsa-miR-410     |
| 2027.08   | hsa-miR-146a    | 879610.75 | hsa-miR-212     | 2.40      | hsa-miR-454     |
| 3.41      | hsa-miR-146b-5p | 3.24      | hsa-miR-215     | 8.33      | hsa-miR-483-5p  |
| 33992.68  | hsa-miR-147     | 2.13      | hsa-miR-222     | 2.59      | hsa-miR-485-3p  |
| 2.65      | hsa-miR-148b    | 1238.50   | hsa-miR-23a     | 1822.62   | hsa-miR-486-5p  |
| 2.18      | hsa-miR-16      | 518408.66 | hsa-miR-27b     | 93405.45  | hsa-miR-487b    |
| 3.31      | hsa-miR-183     | 2.80      | hsa-miR-29a     | 4773.19   | hsa-miR-490-3p  |
| 40.22     | hsa-miR-184     | 15.46     | hsa-miR-31      | 5.59      | hsa-miR-494     |
| 2.42      | hsa-miR-185     | 958.24    | hsa-miR-323-3p  | 22.18     | hsa-miR-502-3p  |
| 2.32      | hsa-miR-186     | 2.33      | hsa-miR-324-3p  | 154726.90 | hsa-miR-509-5p  |
| 2.03      | hsa-miR-192     | 2.27      | hsa-miR-330-3p  | 1551.36   | hsa-miR-511     |
| 112.21    | hsa-miR-193a-3p | 2.31      | hsa-miR-337-5p  | 5789.74   | hsa-miR-515-5p  |
| 2.07      | hsa-miR-361-5p  | 2.64      | hsa-miR-345     | 86.59     | hsa-miR-517b    |
| 25.02     | hsa-miR-518b    | 89.68     | hsa-miR-520a-3p | 119.09    | hsa-miR-548c-5p |
| 50432.25  | hsa-miR-518e    | 351.03    | hsa-miR-523     | 2.08      | hsa-miR-574-3p  |
| 72.02     | hsa-miR-518f    | 161692.22 | hsa-miR-542-5p  | 20943.98  | hsa-miR-579     |
| 11566.99  | hsa-miR-519a    | 4.05      | hsa-miR-545     | 1000.34   | hsa-miR-582-3p  |
| 49.56     | hsa-miR-519d    | 176163.05 | hsa-miR-548b-3p | 3.78      | hsa-miR-590-5p  |

|       |             |      |                |       |             |
|-------|-------------|------|----------------|-------|-------------|
| 10.54 | hsa-miR-616 | 2.59 | hsa-miR-628-5p | 31.70 | hsa-miR-672 |
| 59.71 | hsa-miR-618 | 2.63 | hsa-miR-660    | 93.08 | hsa-miR-708 |

72 miRNAs which were up-regulated by more than 2 FC in the Sup-T1 cell-line.

(B)

| <b>FC</b> | <b>miRNA</b>     | <b>FC</b> | <b>miRNA</b>    | <b>FC</b> | <b>miRNA</b>   |
|-----------|------------------|-----------|-----------------|-----------|----------------|
| 2.19E-05  | hsa-miR-423-5p   | 7.23E-04  | hsa-miR-362-3p  | 0.166     | hsa-miR-671-3p |
| 3.61E-05  | hsa-miR-152      | 7.90E-04  | hsa-miR-429     | 0.204     | hsa-miR-136    |
| 4.23E-05  | hsa-miR-375      | 0.001     | hsa-miR-874     | 0.265     | hsa-miR-302c   |
| 4.57E-05  | hsa-miR-145      | 0.001     | hsa-let-7b      | 0.280     | hsa-miR-142-5p |
| 8.36E-05  | hsa-miR-100      | 0.001     | hsa-miR-339-5p  | 0.340     | hsa-miR-221    |
| 9.22E-05  | hsa-miR-125b     | 0.001     | hsa-miR-582-5p  | 0.344     | hsa-let-7a     |
| 9.38E-05  | hsa-miR-193a-5p  | 0.001     | hsa-let-7c      | 0.362     | hsa-miR-27a    |
| 1.21E-04  | hsa-miR-501-3p   | 0.001     | hsa-miR-187     | 0.398     | hsa-miR-342-5p |
| 1.68E-04  | hsa-miR-548d-3p  | 0.002     | hsa-miR-125a-3p | 0.404     | hsa-miR-129-3p |
| 1.93E-04  | hsa-miR-101      | 0.003     | has-miR-155     | 0.418     | hsa-miR-92a    |
| 2.01E-04  | hsa-miR-502-5p   | 0.003     | hsa-miR-129-5p  | 0.433     | hsa-miR-301a   |
| 2.48E-04  | hsa-miR-32       | 0.004     | hsa-miR-505     | 0.443     | hsa-miR-29c    |
| 2.83E-04  | hsa-miR-450b-5p  | 0.004     | hsa-miR-503     | 0.452     | hsa-miR-515-3p |
| 3.02E-04  | hsa-miR-23b      | 0.004     | hsa-miR-576-5p  | 0.458     | hsa-miR-197    |
| 3.77E-04  | hsa-miR-629      | 0.008     | hsa-miR-518d-3p | 0.479     | hsa-miR-93     |
| 4.19E-04  | hsa-miR-219-1-3p | 0.018     | hsa-miR-489     | 0.067     | hsa-miR-376c   |
| 5.14E-04  | hsa-miR-139-3p   | 0.020     | hsa-miR-200a    | 0.102     | hsa-miR-487a   |
| 5.39E-04  | hsa-miR-570      | 0.032     | hsa-miR-362-5p  | 0.109     | hsa-miR-130a   |
| 5.39E-04  | hsa-miR-548d-5p  | 0.050     | hsa-miR-99a     | 0.159     | hsa-miR-99b    |
| 6.44E-04  | hsa-miR-597      | 0.001     | hsa-miR-135a    | 0.001     | hsa-miR-340    |

60 miRNAs which were down-regulated by more than 2 FC in the Sup-T1 cell-line.
